# Supplementary material for: Preparation of small-sized graphene oxide sheets and their biological applications
Source: Royal Society of Chemistry journal article supplement (doi:10.1039/c5tb01800e), 2015-11-18
Supplement: c5tb01800e1.pdf [file c5tb01800e1.pdf]

## Supporting Information

### Preparation of Small-Sized Graphene Oxide Sheets from Carbon Nanohorns and Their Biological Applications

Minfang Zhang, Toshiya Okazaki, Yoko Iizumi, Eijiro Miyako, Ryota Yuge, Shunji Bandow, Sumio Iijima, Masako Yudasaka

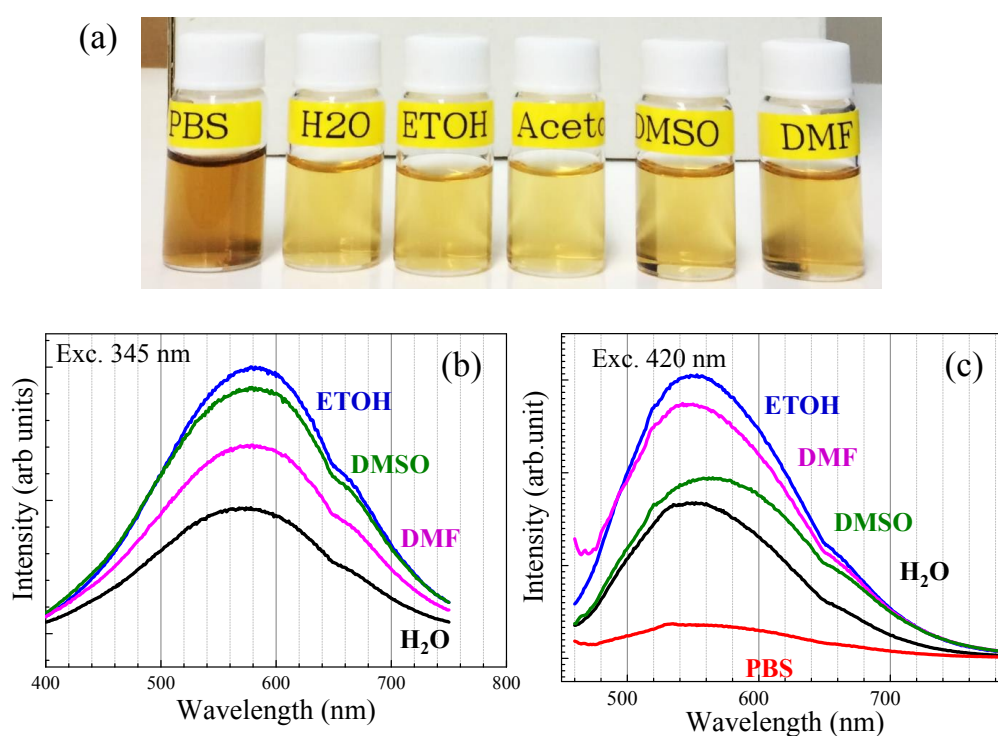

**Figure S1.** (a) Dispersion of the prepared S-GO in various solvents. (b, c) Fluorescence spectra of S-GO dispersed in organic solvents at excitation wavelengths of 345 nm (b) and 420 nm (c).

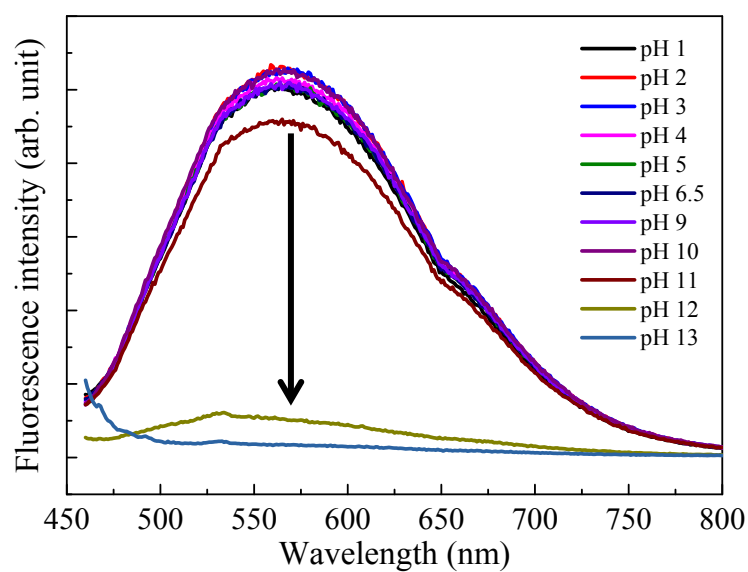

**Figure S2.** The fluorescence spectra of the prepared S-GO sample in aqueous solutions with different pH levels. The arrow indicates the fluorescence intensity decrease of S-GO in basic pH solutions.

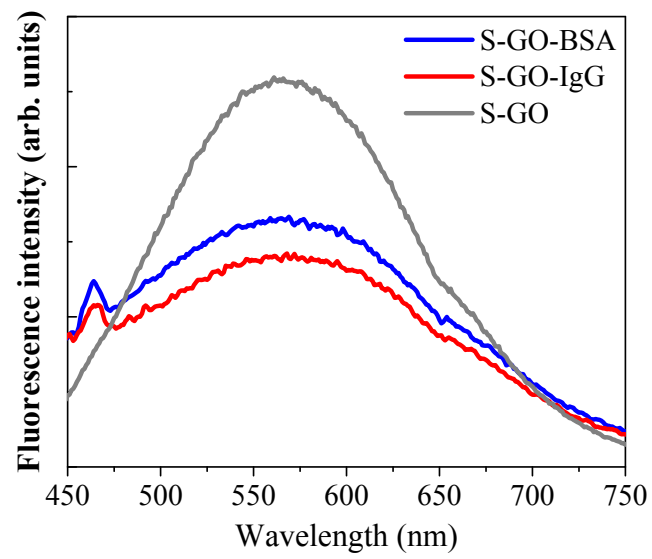

**Figure S3.** The fluorescence spectra of S-GO-IgG and S-GO-BSA at an excitation wavelength of 400 nm.

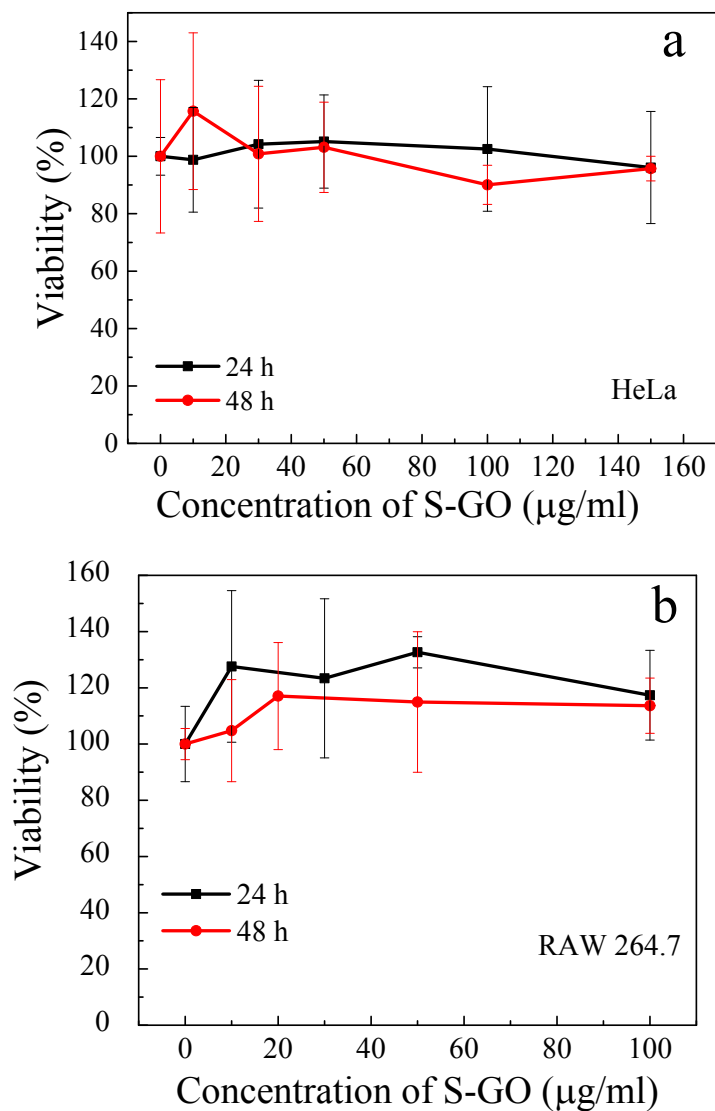

**Figure S4.** The cytotoxicity of S-GO to HeLa cells (a) and RAW 264.7 macrophages (b), determined using a WST-1 assay. All data represent the mean  $\pm$  SD of six independent replicates.

**Equation S1.**

The quantum yield of S-GO dispersed in ethanol was estimated using the following equation,<sup>[1]</sup> where QY is the quantum yield, I is the measured integrated emission intensity,  $\eta$  is the reflective index of the solvent, A is the optical absorption density, subscript “st” refers to a standard with known quantum yield (here, the standard sample used was a fluorescein-ethanol solution; QY<sub>st</sub> = 0.79)<sup>[2]</sup>, and subscript “x” refers to the sample.

$$QY_x = QY_{st} \left( \frac{I_x}{I_{st}} \right) \left( \frac{\eta_x}{\eta_{st}} \right)^2 \left( \frac{A_{st}}{A_x} \right)$$

The fluorescence spectrum and absorbance were measured at an excitation wavelength of 480 nm in a 10 × 10 mm fluorescence cuvette. The results are shown in Table S1.

[1] J. N. Demas, and G. A. Crosby, *J. Phys. Chem.* **1971**, 75, 991–1023.

[2] R. E. Kellogg, and R. G. Bennett *J. Chem. Phys.* **1964**, 41, 3042-3045.

**Table S1.** The quantum yield of S-GO at an excitation wavelength of 480 nm.

| Sample      | Integrated emission intensity ( <i>I</i> ) | Absorbance at 480 nm | Refractive index of solvent ( $\eta$ ) | Quantum yield ( <i>Q</i> ) |
|-------------|--------------------------------------------|----------------------|----------------------------------------|----------------------------|
| Fluorescein | 2066715                                    | 0.2638               | 1.36                                   | 0.79                       |
| S-GO        | 57248                                      | 0.147                | 1.36                                   | 0.039                      |

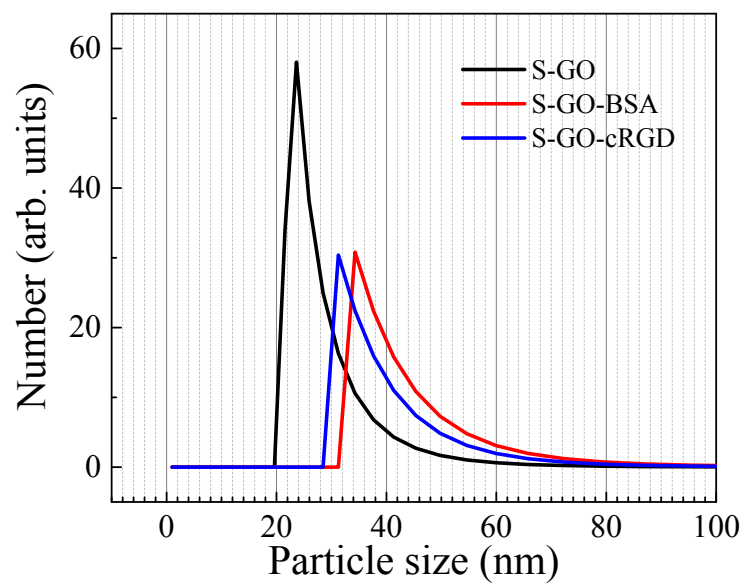

Figure S5. DLS measurements of aqueous dispersions of S-GO-BSA, S-GO-cRDG and S-GO particles.
